# Supplementary material
Source: publisher figshare collection journal article supplement (https://frontiersin.figshare.com/ndownloader/files/33914528)
Supplement: Supplementary file 1 [file 33914528]

Table A. Responses (and number of participants) to the question, “What is your title?” for the Educator Survey.

| Title | Number of Participants |
| --- | --- |
| Teacher/Science Teacher | 93 |
| Special Education Teacher | 6 |
| RSP Teacher | 1 |
| Substitute Teacher | 1 |
| Lead Teacher, Coordinator | 4 |
| School Counselor | 3 |
| Librarian | 1 |
| Instructor/Adjunct Instructor | 5 |
| Professor/Adjunct Professor | 4 |
| ASB Advisor | 1 |
| Dean of Mathematics and Science | 1 |
| Education Program Manager | 1 |
| Psychiatric School Social Worker | 1 |
| Assistant Principle | 3 |
| Principal | 1 |
| Speech Therapist/Speech Language Pathologist | 2 |
| Community Educator | 1 |
| Campus Assistant/Intern | 2 |
| Garden Specialist Teacher | 1 |
| Executive Director | 1 |

Table B. Responses (and number of participants) to the question, “What is your profession?” for the Landscape Professional Survey.

| Profession | Number of Participants |
| --- | --- |
| Landscape Designer/Landscape Architect | 39 |
| Urban Planner | 5 |
| Arborist/Horticulturalist | 4 |
| Education | 2 |
| Farmer | 2 |
| Urban Forestry | 2 |
| Master Gardener | 2 |
| Other: Water Quality and Env. Compliance;  Public Works Maintenance Worker; Grip; Researcher;  Retired Electrical Engineer; Lead Sampling Technician | 6 |

Table C. Responses (and number of participants) to the question, “What is your title?” for the Policy-Maker Survey.

| Title | Number of Participants |
| --- | --- |
| Councilmember | 2 |
| Mayor | 1 |
| Council Member and Teacher | 1 |
| College Board Trustee | 1 |
| Planner | 1 |
| Event Manager | 1 |
| Management Analyst | 1 |
| Steering Board Member | 1 |
| Environmental Specialist | 1 |
| Director | 1 |
| Project Manager | 1 |

**Community Survey (Residential)**

1. Do you own or rent your home? (Rent, Own)
2. What type of home do you live in? (single family, duplex, triplex, multifamily apartment, mobile home, townhome, condominium, farm)
3. Do you have and maintain a yard, landscaped area, or shared green space? (LOGIC: If no, skip to Q13)
4. Does that area have a lawn/grass/native plants? (yes, no)
5. How do you maintain that area? (check all that apply)

Remove weeds

Mow grass

Rake leaves

Water

Use dyed mulch

Use natural mulch

I have a gardener

Other (please describe) ______

1. Do you use fertilizer in that area?

No/Don’t use

Yes, monthly

Yes, once a year

Yes, twice a year

Other (please describe) ______

1. Do you use pesticides in that area?

No/Don’t use

Yes, monthly

Yes, once a year

Yes, twice a year

Other (please describe) ______

1. Does that area have earthworms in the soil? (yes, no, don’t know)
2. Have you ever seen mushrooms growing in that area? (yes, no, don’t know)
3. Have you ever taken any steps to improve the soil in that area (e.g., soil testing, compost application, mulching, etc.)? (yes, no, don’t know)
4. What do you do with your green waste from that area (e.g., sticks, leaves, grass clippings, etc.)? (check all that apply) LOGIC: If no green waste OR compost at home are not checked, Q12; else Q13)

There is no green waste

Put it in the trash (black bin)

Put it in the green waste bin (LOGIC: If checked, skip Q23)

Compost them at home / bury it/ put it in a pile

Nothing, leave it where it lies

Use it as mulch

Send it to nearby community compost hubs

Lawn maintenance/gardener takes care of it

Sweep it into the street

Other____________

1. What are some reasons you don’t compost green waste at home? (check all that apply)

No reason / never thought of it

Attracts animals

Takes too much time/I don’t have time

Not enough space / no place for it

Don’t have much to get rid of / no garden or lawn

I use the green waste bin (LOGIC:If checked, skip Q23)

Smell is bad

I don’t have a compost bin / equipment

I don’t know how to compost

Disposal cost

I plan to in the future

Other ____________

Questions 13-22 are focused on understanding gardening practices, interest, and knowledge

1. Do you currently have or have you ever had a garden or patio garden? (LOGIC: If no, skip to Q16)
2. What do/did you grow in your garden? (check all that apply)

vegetables

flowers

shrubs/bushes

herbs

trees

succulents

other_______

1. How long have you been gardening?

0-6 months

6 months-2 years

2-5 years

5-10 years

10-15 years

15-20 years

>20 years

1. How would you describe or rate your interest in gardening? (Scale 1-5)
2. How knowledgeable are you about gardening? (Scale 1-5)
3. In terms of my gardening background, I (check all that apply)

Grew up on a farm

Grew up with a food garden

Have worked on a farm

Have an immediate family member who has worked on a farm

Learned about farming/gardening in school or from family/friends

None of the above

1. How often do you and/or members of your household use a public green space (e.g., parks, community garden, schoolyard, etc.)?

Daily

Frequently

Sometimes

Rarely

Never

1. Are you concerned about the quality of soil in public green spaces?

Yes

No

I’ve never thought about this

1. Did the recent COVID-19 (coronavirus) pandemic change your interest or behavior around gardening and/or soil? Yes, No (LOGIC: If yes, Q22)
2. How did the COVID-19 (coronavirus) pandemic change your interest or behavior around gardening and soil? (check all that apply; skip if nothing changed)

       Became less important

Became more important

Learning about gardening

Learning about soil health

Learning about composting

Spending time in my yard/garden/patio garden

Spending time in public green spaces

Spending time gardening

Questions 23-26 are focused on composting and recycling

1. As part of regular trash service, people often receive a black trash bin, a blue recycling bin, and a green waste bin. Do you have a green waste bin at home or in your complex?

Yes, and I use it

Yes, but I don’t use it

No, and I am not interested in having one

No, but I want one

I don’t know

1. What do you do with your plant-based kitchen scraps and food waste? (check all that apply)

Put them in the trash (black bin)

Put them in the compost bin (green bin)

Take them to a nearby community compost hub

Compost them at home

Put them down the garbage disposal or drain

Other_______

1. How knowledgeable are you about composting? (Scale 1-5)
2. Do you recycle at your home? (Scale 1-5)

Questions 27-34 are focused on interest in and knowledge about soil

1. Please describe your level of interest in the following areas (Scale 1-5)

How soil impacts the nutrition of food and food security

How soil stores carbon and slows down climate change

Improving soil health

How to control weeds without synthetic pesticides

Soil water holding capacity and drought resiliency

The relationship between soil health and human health

How soil contamination affects environmental health

How improving your soil quality can benefit your plants/trees

1. To me, healthy soil means… (check all that apply)

The soil contains organic matter and nutrients

The soil is loose instead of compacted

There are roots in the soil

Plants and trees grow well in the soil

Water soaks in quickly

There are earthworms/insects in the soil

There are bacteria/mushrooms/fungi in the soil

I’ve never really thought about what healthy soil means to me

1. How knowledgeable are you about the following factors that affect soil health (Scale 1-5)

Physical composition of soil (e.g., sand, silt, clay)

Soil pH (acidity/basicity)

Soil bulk density

Soil permeability

Soil chemistry (e.g., nitrogen, phosphorous, potassium)

Soil biodiversity

1. Have you ever attempted to learn about your soil? (check all that apply)

No/never

Online websites or books

Asking friends or family

Attending webinars, workshops, tours, or trainings

Soil testing

LA Soil Survey

Other (please describe) _______

1. Are you concerned about soil contaminants and pollution in your community? (yes, no, I’ve never thought about it)
2. Which, if any, of the following soil-related topics would you like to learn more about? (Matrix; Not at all interested, Somewhat interested, Very interested)

How to find information about past uses of a plot of land

Which contaminants to test for

Geographic areas of LA where there are high levels of soil contamination

Importance of obtaining a soil test prior to working in the soil/gardening

Where to get soil testing done

How much soil testing costs

How to correctly take a soil sample for a soil test

How to test soil permeability

How to determine soil texture (e.g., sandy, clay, loam)

How to measure soil compaction

How to protect soil before, during and after construction activities

Contamination risks associated with imported materials such as potting soil, compost, or mulch

How to reduce soil contamination exposure when gardening

Health problems associated with contaminated soil

The relationship between soil and climate change

The relationship between soil and water pollution

Other (please describe) __________

1. Have you ever tested your soil? (Yes, No, Don’t know) (LOGIC: If yes, Q34; else Q35)
2. What did you test for and what did you learn? __________

Questions 35-45 are demographic questions

1. What is your gender?

Male

Female

Other

1. In what year were you born? _______________
2. How concerned are you with environmental issues? (Scale 1-5)
3. Number of people in your household including yourself
4. What is the highest level of school you have completed or the highest degree you have received?

Never attended school OR only attended Kindergarten

Grades 1 through 8 (Elementary Only)

Grades 9 through 11 (Some High School)

Grade 12 (High School Graduate)

GED

Some College

Trade or Technical School (Includes 2-Year Degree)

College Graduate (4-Year Degree)

Graduate College Degree (Post Graduate Degree)

1. How do you identify? Check that all that apply.

White

Hispanic/Latino/a

Black or African-American

Asian

Other

1. What is your profession (open ended)
2. What is your zip code?
3. We don’t need to know exactly, but just roughly, what is your annual household income from all sources before taxes:

Less than $12,000

From $12,000 to $25,000

From $25,000 to $50,000

From $50,000 to $75,000

From $75,000 to $100,000

Over $100,000

1. Can TreePeople contact you with more information about soil in LA? If yes, email:____________
2. Is there anything else you’d like to share with us about soil-related needs, challenges, and potential opportunities in your community? (open-ended)
3. If you like to be entered into the raffle for a chance to win one of several $50 gift cards, please enter your email here:____________ We will only contact you if you win the raffle, unless you said you wanted to learn more about soil in our previous question.

**Professional Survey (e.g., Landscapers and Builders)**

1. What is your profession (open ended)
2. When designing a residential, public, or commercial green space, what aspects do you consider most important? (check all that apply)

Client’s preferences

Climate-appropriate plants, shrubs, and trees

Building materials that conserve energy and save water (or other eco-friendly materials)

Spaces that take advantage of sun, wind and rain

Taking advantage of nature's filtering systems (e.g., protecting soil, using bioswales)

Native plants

Minimizing water runoff / hydrology

Accounting for past human uses / contemporary and historical context

How the landscape will age

How it fits into a broader ecosystem and regional landscape

Maintenance specifications

Topography

Future needs and requirements

How people will use the space

Ecological functions

Constructability

Soil specifications for a particular use

Other ___________

1. Do your designs typically include turf grass, trees, or native plants? (Scale 1-5 )
2. Do you typically take any steps to improve the soil, protect soil health, or replace the soil in your projects? (yes, no, don’t know; LOGIC: If no/don’t know, skip Q5)
3. Please briefly describe how you work to improve and/or protect the soil in your projects (open ended)
4. What are the primary soil-related challenges you encounter when working on projects (check all that apply)

Land use conflicts

Soil compaction

Soil sealing and increasing impervious surfaces

Limited available spaces and/or not enough soil volume for trees, plants, and vegetation

Topsoil is removed

Lacks organic matter

Poor soil health or soil quality

Soil contamination

Long-term maintenance considerations

Other (please specify)_________

1. What do usually you do with green waste from projects? (check all that apply) (LOGIC: if Trash, Q8; else Q9)

Take it to the dump/put them in the trash

Take it to a city compost facility

Use it as mulch

Compost it at my business

My projects have no green waste

Other (please describe) ____________

1. Why don’t you compost or use the green waste from your projects as mulch? (check all that apply)

No reason / never thought of composting

Don’t have composting facilities

Don’t know how to compost/mulch

Don’t want added costs

Takes too much time

Other (please describe) ____________

Questions 9-17 are focused on understanding experience and knowledge

1. How long have you been in your profession?

0-5 years

6-10 years

11-15 years

16-20 years

>20 years

1. Please describe your level of interest in the following areas (Scale 1-5)

How soil impacts the nutrition of food and food security

How soil stores carbon and slows down climate change

Improving soil health

How to control weeds without synthetic pesticides

Soil water holding capacity and drought resiliency

The relationship between soil health and human health

How soil contamination affects environmental health

How improving your soil quality can benefit plants/trees

1. To me, healthy soil means… (check all that apply)

The soil contains organic matter and nutrients

The soil is loose instead of compacted

There are roots in the soil

Plants and trees grow well in the soil

Water is absorbed quickly

There are earthworms/insects in the soil

There are bacteria/mushrooms/fungi in the soil

I’ve never really thought about what healthy soil means to me

1. How knowledgeable are you about the following factors that affect soil health (Scale 1-5)

Physical composition of soil (e.g., sand, silt, clay)

Soil pH (acidity/basicity)

Soil bulk density

Soil permeability

Soil chemistry (e.g., nitrogen, phosphorous, potassium)

Soil organic matter

Soil biodiversity

1. Have you ever attempted to learn about soil for your projects? (check all that apply)

No/never

Online websites or books

Asking friends or family

Attending webinars, workshops, tours, or trainings

Soil testing

LA Soil Survey

Other_______

1. How concerned are you about soil contaminants and pollution? (Scale 1-5)
2. How concerned are your clients about soil contaminants and pollution? (Scale 1-5)
3. What, if any, remediation techniques do you use to reduce soil contamination? (open ended)
4. Which, if any, of the following soil-related topics would you like to learn more about? (Matrix; Not at all interested, Somewhat interested, Very interested)

How to find information about past uses of a plot of land

Which contaminants to test for

Geographic areas of LA where there are high levels of soil contamination

Importance of obtaining permission prior to digging

Importance of obtaining a soil test prior to digging

Where to send soil samples

How much soil testing costs

How to correctly take a soil sample for a soil test

How to test soil permeability

How to determine soil texture (e.g., sandy, clay, loam)

How to measure soil compaction

How to protect soil before, during and after construction activities

Best management practices for remediating contaminated urban soils

Contamination risks associated with imported materials such as potting soil, compost, or mulch

How to reduce soil contamination exposure when working

Health problems associated with contaminated soil

LA’s Soil Survey

The relationship between soil and climate change

The relationship between soil and water pollution

Other (please describe)___________

Questions 18-24 are demographic questions

1. What is your gender?

Male

Female

Other

1. In what year were you born? _______________
2. What is the highest level of school you have completed or the highest degree you have received?

Never attended school OR only attended Kindergarten

Grades 1 through 8 (Elementary Only)

Grades 9 through 11 (Some High School)

Grade 12 (High School Graduate)

GED

Some College

Trade or Technical School (Includes 2-Year Degree)

College Graduate (4-Year Degree)

Graduate College Degree (Post Graduate Degree)

1. How do you identify? Check that all that apply.

White

Hispanic/Latino/a

Black or African-American

Asian

Other

1. What is the zip-code for your business?
2. Can TreePeople contact you with more information about soil in LA? If yes, email:____________
3. Is there anything you’d like to share with us about soil-related needs, challenges, and potential opportunities at work? (open-ended)
4. If you like to be entered into the raffle for a chance to win one of several $50 gift cards, please enter your email here:____________ We will only contact you if you win the raffle, unless you said you wanted to learn more about soil in our previous question.

**Professional Survey (Policy-Makers)**

1. How important do you think soil is? (Scale 1-5)
2. Are you aware of any soil specifications (e.g., soil requirements in street tree planting standards, soil requirements for stormwater management, imported soils for urban uses) in your jurisdiction? (No, Yes; if yes, please describe___________)
3. Is there a budget item in this fiscal year (FY 2020-2021) that includes funding for soil health (e.g., contamination, remediation, testing, water conservation, etc.)? (Yes, No, Don’t know) (LOGIC: If yes, Q4; if not, Q5)
4. Will that budget item continue to be funded in the next fiscal year? (Definitely, Probably, Maybe, Unlikely, Definitely Not)
5. What are the barriers to funding projects related to soil health? (open question)
6. Does your jurisdiction have a compost facility (materials drop off/pick up)? (yes, no, don’t know) (LOGIC: If yes, Q7; no/don’t know, Q8)
7. Who manages the facility? (check all that apply)

Municipality

NGO

Private sector

Don’t know

Other (please specify)

1. Does your jurisdiction have a mulching facility (materials drop off/pick up)? (yes, no, don’t know) (LOGIC: If yes, Q9; no/don’t know Q10)
2. Who manages the facility? (check all that apply)

Municipality

NGO

Private sector

Don’t know

Other (please specify)

1. Please describe your level of interest in the following areas (Scale 1-5)

How soil impacts the nutrition of food and food security

How soil stores carbon and slows down climate change

Improving soil health in my jurisdiction

Minimizing synthetic-based fertilizers and pesticides in my jurisdiction

Soil water holding capacity and drought resiliency

The relationship between soil health and human health

How soil contamination affects environmental health

1. To me, healthy soil means… (check all that apply)

The soil contains organic matter and nutrients

The soil is loose instead of compacted

There are roots in the soil

Plants and trees grow well in the soil

Water is absorbed quickly

There are earthworms and insects in the soil

There are bacteria and fungi in the soil

I’ve never really thought about what healthy soil means to me

1. How knowledgeable are you about the following factors that affect soil health (Scale 1-5)

Physical composition of soil (e.g., sand, silt, clay)

Soil pH (acidity/basicity)

Soil bulk density

Soil permeability

Soil chemistry (e.g., nitrogen, phosphorous, potassium)

Soil organic matter

Soil biodiversity

1. Have you ever attempted to learn about soil? (check all that apply)

No/never

Online websites or books

Asking friends or family

Attending webinars, workshops, tours, or trainings

Soil testing

LA Soil Survey

Other (please describe) _______

1. How concerned are you about soil contaminants and pollution? (Scale 1-5)
2. How concerned about soil contaminants and pollution are community members in your jurisdiction? (Scale 1-5)
3. Have community members in your jurisdiction ever reached out to inquire about soil testing? (Yes, No, Don’t know; LOGIC: if yes, Q17; else Q18)
4. How do you handle calls/requests for soil testing? (open ended)
5. Which, if any, of the following soil-related topics would you like to learn more about? (Matrix; Not at all interested, Somewhat interested, Very interested)

How to find information about past uses of a plot of land (land use history)

Which contaminants to test for

Geographic areas of LA where there are high levels of soil contamination

Importance of obtaining a soil test prior to digging

Where to send soil samples

Guidelines for soil testing and management

Contamination risks associated with imported materials such as potting soil, compost, or mulch

How to reduce soil contamination exposure when working/gardening

Health problems associated with contaminated soil

LA’s Soil Survey

The relationship between soil and climate change

The relationship between soil and water pollution

The need for soil specifications for particular uses (e.g., street tree planting vs. rain gardens)

Soil related policy, programs, funding, standards, and plans

Other (please describe)

Questions 19-28 are demographic questions

1. What is your gender?

Male

Female

Other

1. In what year were you born? _______________
2. How concerned are you with environmental issues? (Scale 1-5)What is the highest level of school you have completed or the highest degree you have received?

Never attended school OR only attended Kindergarten

Grades 1 through 8 (Elementary Only)

Grades 9 through 11 (Some High School)

Grade 12 (High School Graduate)

GED

Some College

Trade or Technical School (Includes 2-Year Degree)

College Graduate (4-Year Degree)

Graduate College Degree (Post Graduate Degree)

1. How do you identify? Check that all that apply.

White

Hispanic/Latino/a

Black or African-American

Asian

Other

1. What is your title (open ended)
2. What is the zip-code for your jurisdiction?
3. Are you employed by the city, county, state, or federal government? (check)
4. Would you be interested in receiving future communications from and/or collaborating with TreePeople’s Healthy Soils for Healthy Community Initiative? If yes, email:____________
5. Is there anything you’d like to share with us about soil-related needs, challenges, and potential opportunities in your jurisdiction? (open-ended)

**Professional Survey (e.g., Teachers/Educators)**

1. Does your school have a green space or garden? (yes, no, don’t know; LOGIC: if no, skip Q2-Q10)
2. Does your school use pesticides and/or fertilizers in that area? (yes, no, don’t know)
3. Please describe what that area looks like (e.g., grass, trees, gravel, bare dirt, etc.). (open ended).
4. Do you or others at your school teach classes in that area? (Yes, No, Don’t know) LOGIC: if yes, Q5; else Q6)
5. Please describe how you or others use that area to teach. (open ended)
6. Does that area have earthworms in the soil? (yes, no, don’t know)
7. Have you ever seen mushrooms growing in? (yes, no, don’t know)
8. Have your administrators/landscapers taken any steps to improve the soil in that area (yes, no, don’t know; LOGIC: If yes, Q9; else Q10)
9. Please describe how the soil in that area has been improved (e.g., soil testing, compost application, mulching, removing concrete, planting trees, etc.). (open ended)
10. What does your school do with green waste from that area (e.g., sticks, leaves, grass clippings)? (check all that apply)

Don’t know

Put it in the trash (black bin)

Put it in a city compost/green bin

Use it as mulch

Compost it on campus

Nothing, leave it where it lies

Other____________

1. Does your school recycle? (Yes, No, Don’t know)
2. Does your school have a compost bin/facility? (Yes, No, Don’t know) (LOGIC: If No/Don’t know, Q13; else Q14)
3. Do you think there is interest in having a compost bin/facility in the future? (Yes, No, Don’t know)

Questions 14-27 are focused on understanding experience, knowledge, and interest in soil

1. How long have you been teaching?

0-5 years

6-10 years

11-15 years

16-20 years

>20 years

1. How would you describe your interest in gardening or horticultural plants? (Scale 1-5)
2. How knowledgeable are you about composting? (Scale 1-5)
3. How knowledgeable are you about soil? (Scale 1-5)
4. Do you currently teach about soil in your class? (Yes, No) (LOGIC: If no, skip Q20)
5. Do you feel comfortable teaching about soil in your class? (Yes, No, Somewhat)
6. How did COVID-19 impact your ability to teach about soil? (open-ended)
7. Please describe your level of interest in the following areas (Scale 1-5)

How soil impacts the nutrition of food and food security

How soil stores carbon and slows down climate change

Improving soil health

How to control weeds without synthetic pesticides

Soil water holding capacity and drought resiliency

The relationship between soil health and human health

How soil contamination affects environmental health

How improving your soil health can benefit plants/trees

1. To me, healthy soil means… (check all that apply)

The soil contains organic matter and nutrients

The soil is loose instead of compacted

There are roots in the soil

There are no miscellaneous inorganic wastes

Plants and trees grow well in the soil

Water is absorbed quickly

There are earthworms and insects in the soil

There are bacteria/mushrooms/fungi in the soil

I’ve never really thought about what healthy soil means to me

1. How knowledgeable are you about the following factors that affect soil health (Scale 1-5)

Physical composition of soil (e.g., sand, silt, clay)

Soil pH (acidity/basicity)

Soil bulk density

Soil permeability

Soil chemistry (e.g., nitrogen, phosphorous, potassium)

Soil organic matter

Soil biodiversity

1. Have you ever attempted to learn about soil? (check all that apply)

No/never

Online websites or books

Asking friends or family

Attending webinars, workshops, tours, or trainings

Soil testing

LA Soil Survey

Other_______

1. Are you concerned about soil contaminants and pollution on your school campus? (yes, no, I’ve never thought about it)
2. Which, if any, of the following soil-related topics would you like to learn more about? (Matrix; Not at all interested, Somewhat interested, Very interested)

How to find information about past uses of a plot of land

Which contaminants to test for

Geographic areas of LA where there are high levels of soil contamination

Importance of obtaining a soil test prior to working in the soil/gardening

Where to get soil testing done

How much soil testing costs

How to correctly take a soil sample for a soil test

Guidelines for soil testing and/or soil management

Contamination risks associated with imported materials such as potting soil, compost, or mulch

How to reduce soil contamination exposure when gardening

Health problems associated with contaminated soil

The relationship between soil and climate change

The relationship between soil and water pollution

Other (please describe)__________

1. Has the soil on your campus been tested for contaminants? (Yes, No, Don’t know)

Questions 28-40 are demographic questions

1. What is your gender?

Male

Female

Other

1. In what year were you born? _______________
2. How concerned are you with environmental issues? (Scale 1-5)
3. Number of students in your class
4. What grade(s) do you teach? __________
5. What subject(s) do you teach? __________
6. What is the highest level of school you have completed or the highest degree you have received?

Never attended school OR only attended Kindergarten

Grades 1 through 8 (Elementary Only)

Grades 9 through 11 (Some High School)

Grade 12 (High School Graduate)

GED

Some College

Trade or Technical School (Includes 2-Year Degree)

College Graduate (4-Year Degree)

Graduate College Degree (Post Graduate Degree)

1. How do you identify? Check that all that apply.

White

Hispanic/Latino/a

Black or African-American

Asian

Other

1. What is your title (open ended)
2. What is the zip-code for your school?
3. Can TreePeople contact you about our Healthy Soils for Healthy Community Initiative? If yes, email:____________
4. Is there anything you’d like to share with us about soil-related needs, challenges, and potential opportunities in your school or classroom? (open-ended)
5. If you like to be entered into the raffle for a chance to win one of several $50 gift cards, please enter your email here:____________ We will only contact you if you win the raffle, unless you said you wanted to learn more about soil in our previous question.
